# Supplementary material
Source: PubMed Central journal article supplement (PMC6601206)
Supplement: 144360_0_supp_301387_pffgyc.pdf [file 144360_0_supp_301387_pffgyc.pdf]

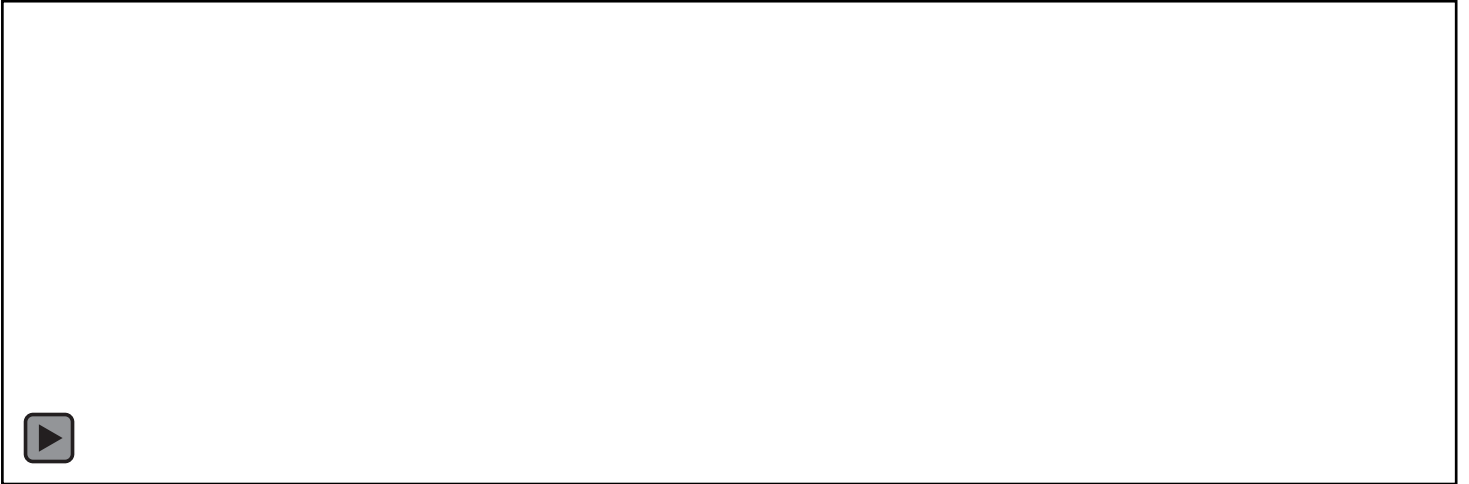

Video 1. CLASP2 and G2L1 colocalization in a 3T3-L1 adipocyte. 3T3-L1 adipocytes were infected with Ad-GFP-CLASP2-HA (green) and mCherry-G2L1-myc (magenta). Live cell visualization was performed with TIRFM. Scale bar represents 10 $\mu$ m.

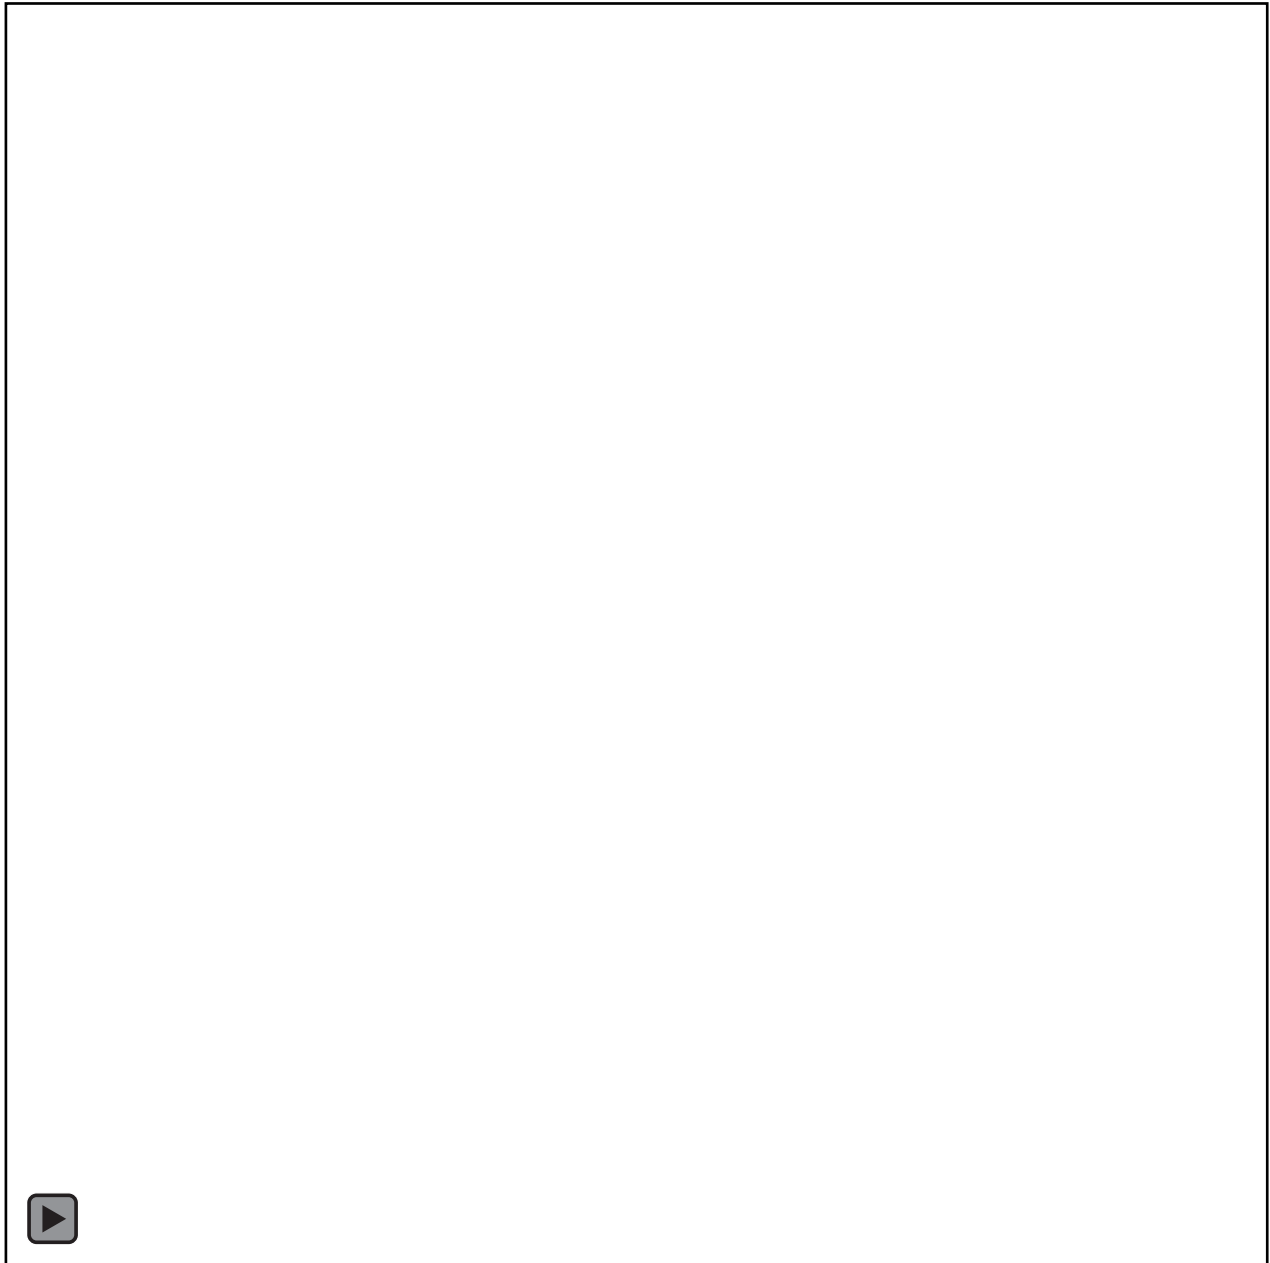

Video 2. Insulin stimulates CLASP2 microtubule plus-end trailing. Adipocytes infected with GFP-CLASP2-HA adenovirus were analyzed by live-cell TIRFM to evaluate the effect of insulin treatment on CLASP2 +TIP dynamics. A representative duo of adipocytes that exhibited CLASP2 trailing are presented. The adipocytes were imaged for GFP to visualize G2L1 in the serum-starved basal state for the first two minutes followed by insulin stimulation. Scale bar represents 10 $\mu$ m.



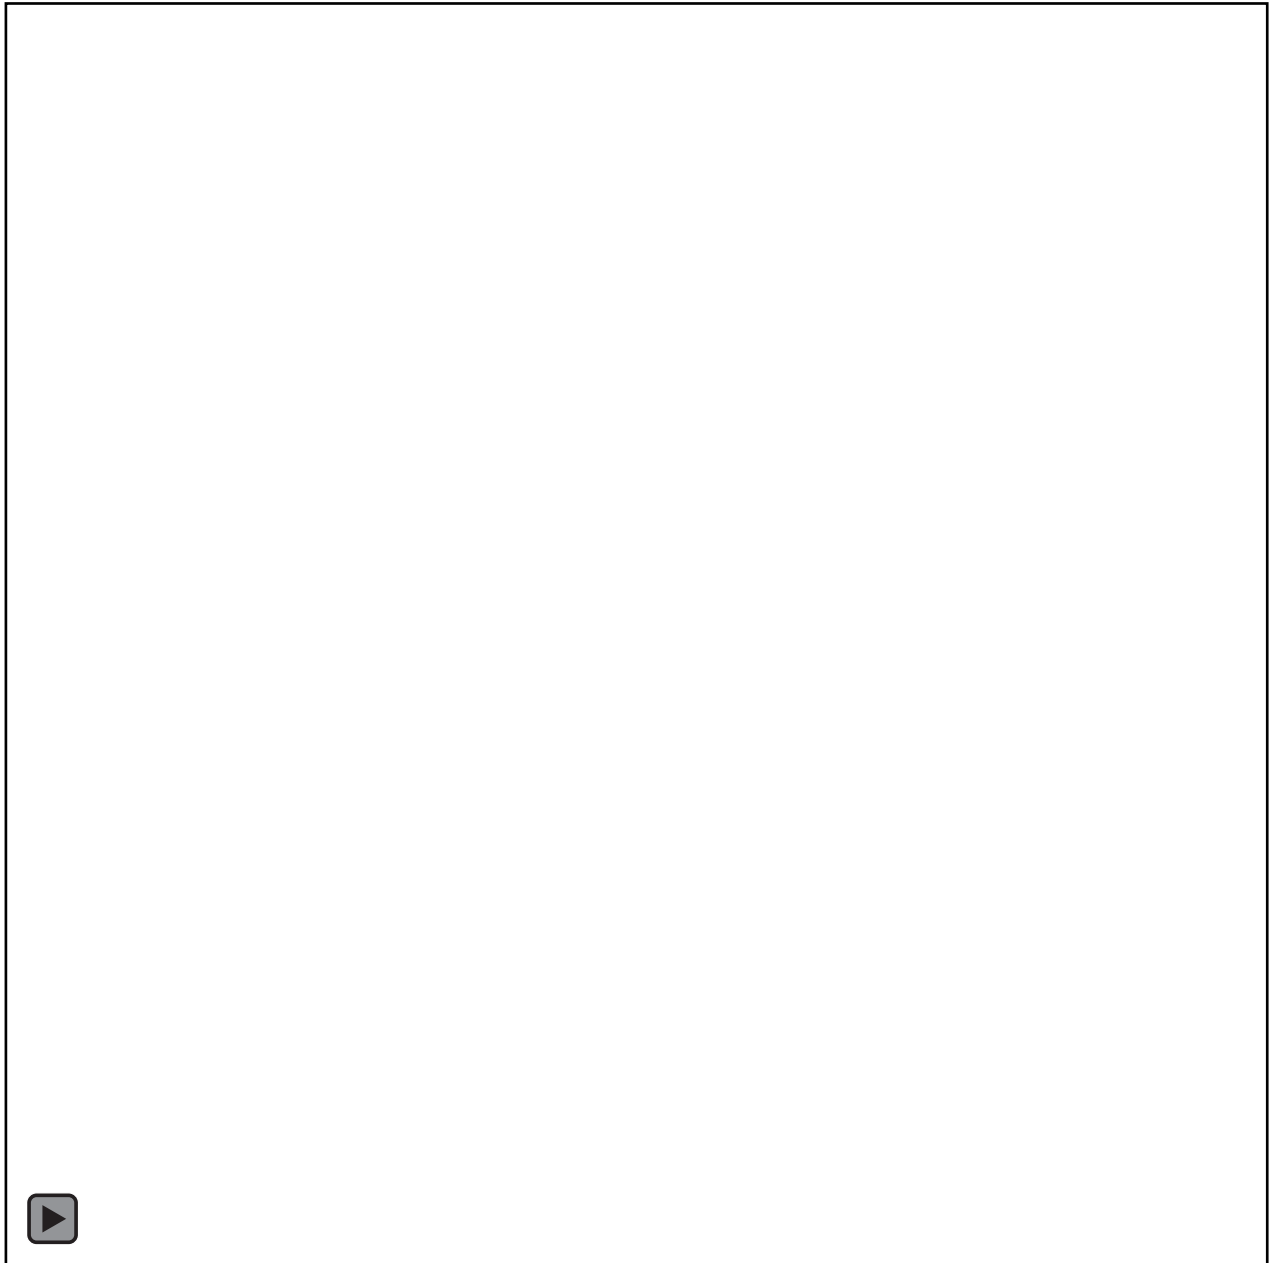

Video 3. Insulin stimulates G2L1 microtubule plus-end trailing. Adipocytes infected with mCherry-G2L1-myc adenovirus were analyzed by live-cell TIRFM to evaluate the effect of insulin treatment on G2L1 +TIP dynamics. A representative adipocyte that exhibited G2L1 trailing is presented. The adipocyte was imaged for mCherry (pseudo-colored magenta) to visualize G2L1 in the serum-starved basal state for the first three minutes followed by insulin stimulation. Scale bar represents 10 $\mu$ m.

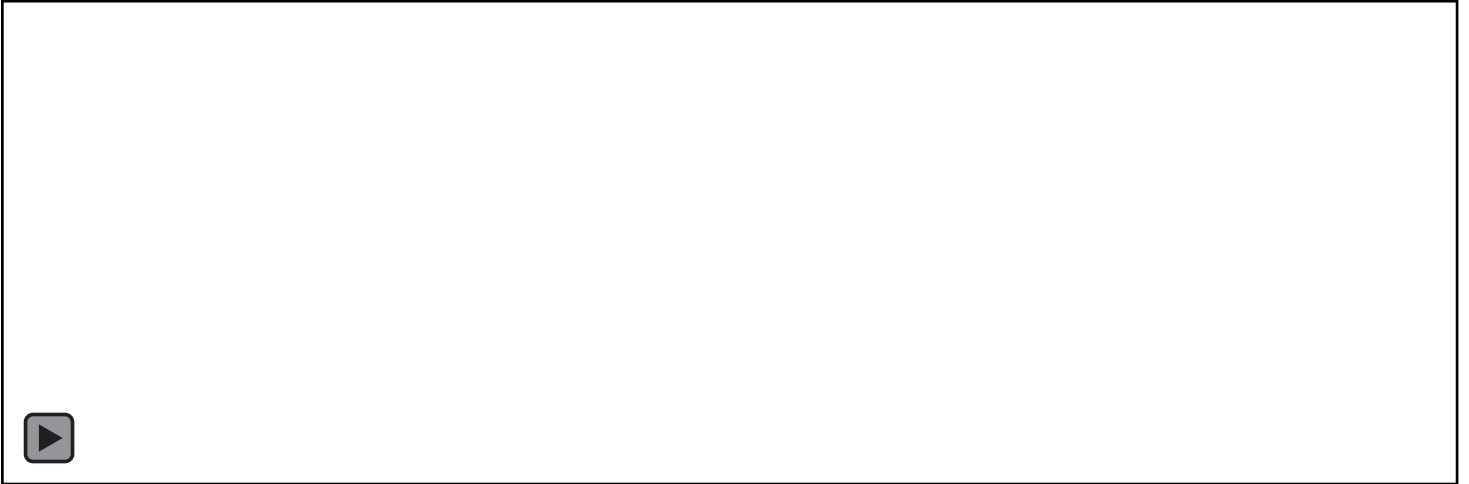

Video 4. Insulin stimulates CLASP2 and G2L1 microtubule plus-end co-trailing. Adipocytes infected with GFP-CLASP2-HA (green) and mCherry-G2L1-myc (pseudo-colored magenta) adenovirus were analyzed by live-cell TIRFM to evaluate the effect of insulin treatment on simultaneous CLASP2 and G2L1 +TIP dynamics. A representative adipocyte that exhibited simultaneous CLASP2 and G2L1 trailing is presented. The adipocyte was imaged for GFP and mCherry to visualize CLASP2 and G2L1, respectively, in the serum-starved basal state for the first three minutes followed by insulin stimulation. Scale bar represents 10 $\mu$ m.
